# Supplementary figures and images for: Multiphoton imaging and Raman spectroscopy of the bovine vertebral endplate
Source: Royal Society of Chemistry journal article supplement (doi:10.1039/d1an00702e), 2021-01-01

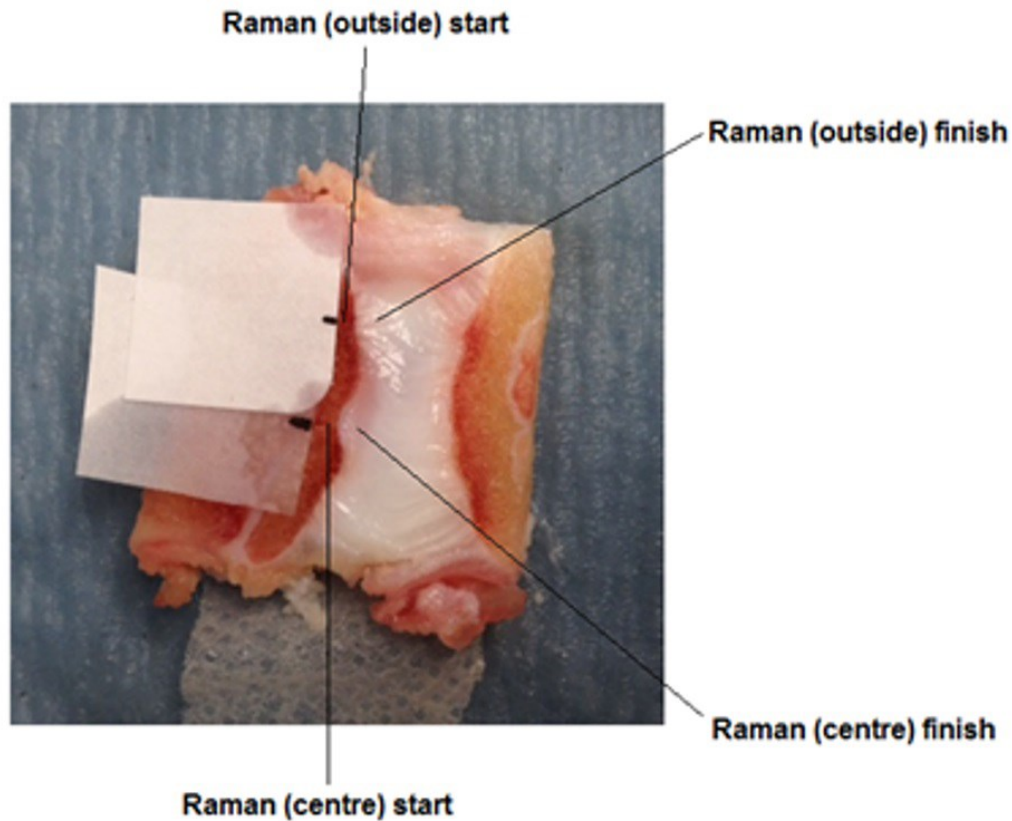

Supplement: d1an00702e2.pdf [file d1an00702e2.pdf]

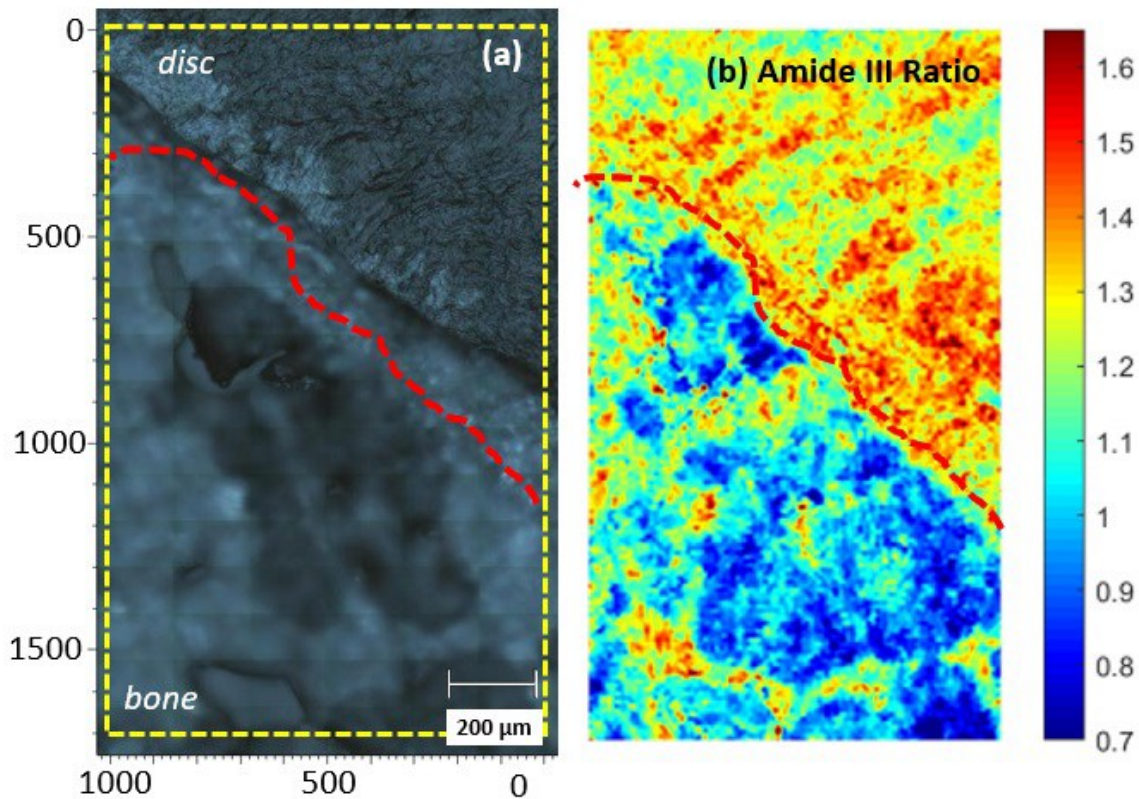

Supplement: d1an00702e3.pdf [file d1an00702e3.pdf]
